# Supplementary material for: Salt-Tolerant Compatible Microbial Inoculants Modulate Physio-Biochemical Responses Enhance Plant Growth, Zn Biofortification and Yield of Wheat Grown in Saline-Sodic Soil
Source: MDPI journal article supplement (doi:10.3390/ijerph18189936), 2021-09-21
Supplement: s1 [file s1]

# Supplementary Materials

**Supplementary Table S1.** Physico-biochemical properties of initial soil used in this study

| S. No. | Soil parameters          | Value                            |
|--------|--------------------------|----------------------------------|
| 1.     | Texture class            | Dystric Eutrudepts (Inceptisols) |
| 2.     | Soil separates           |                                  |
| i.     | Coarse sand (0.2–2.0 mm) | 11.43%                           |
| ii.    | Fine sand (0.02–0.2 mm)  | 17.50%                           |
| iii.   | Silt (0.002–0.02 mm)     | 47.33%                           |
| iv.    | Clay (<0.002 mm)         | 22.57%                           |
| 3.     | pH                       | 8.2                              |
| 4.     | EC                       | 1.8 dsM <sup>-1</sup>            |
| 5.     | ESP                      | 7.67                             |
| 6.     | organic carbon           | 0.37%                            |
| 7.     | Olsen P                  | 22.26 mg kg <sup>-1</sup>        |
| 8.     | total N                  | 55.50 mg kg <sup>-1</sup>        |
| 9.     | K                        | 126.50 mg kg <sup>-1</sup>       |
| 10.    | Zn                       | 0.20 mg kg <sup>-1</sup>         |

**Supplementary Table S2.** Salt tolerance (NaCl) and biochemical properties of selected strains used in this study

| Properties/ characteristics                                       | <i>B. amyloliquefaciens</i> B-16 | <i>T. harzianum</i> UBST H-501   |
|-------------------------------------------------------------------|----------------------------------|----------------------------------|
| Amylase production                                                | +ve                              | +ve                              |
| Salt tolerance (NaCl)                                             | 5.00%                            | 4.50%                            |
| HCN production                                                    | +ve                              | +ve                              |
| IAA production                                                    | +ve                              | +ve                              |
| H <sub>2</sub> O <sub>2</sub> production                          | +ve                              | ND                               |
| Urease test                                                       | +ve                              | ND                               |
| Catalase test                                                     | +ve                              | ND                               |
| Starch hydrolysis                                                 | +ve                              | +ve                              |
| Ammonia production                                                | +ve                              | ND                               |
| Protease production                                               | +ve                              | +ve                              |
| Siderophore production                                            | +ve                              | +ve                              |
| Phosphate solubilization                                          | +ve                              | +ve                              |
| Potash (K) solubilization                                         | +ve                              | +ve                              |
| Zinc oxide (ZnO)                                                  | +ve (5.65 µg ml <sup>-1</sup> )* | +ve (4.50 µg ml <sup>-1</sup> )* |
| Zinc carbonate (ZnCO <sub>3</sub> )                               | +ve (7.05 µg ml <sup>-1</sup> )* | +ve (5.69 µg ml <sup>-1</sup> )* |
| Zinc phosphate [Zn <sub>3</sub> (PO <sub>4</sub> ) <sub>2</sub> ] | +ve (7.50 µg ml <sup>-1</sup> )* | +ve (6.90 µg ml <sup>-1</sup> )* |

\* Represents Zinc concentration (µg ml) in growth medium. Data are mean (n=5).
